# Supplementary material for: Uneven demographic consequences of the 2022 disease outbreak for the sea urchin Diadema antillarum in Puerto Rico
Source: PeerJ. 2023 Dec 20;11:e16675. doi: 10.7717/peerj.16675 (PMC10748467; doi:10.7717/peerj.16675)
Supplement: Supplemental Information 3 — The number of sea urchins found at each transect and the test diameter of 50 individuals (when possible) for 8 sites in Puerto Rico. [file peerj-11-16675-s003.xlsx]

## Sheet: CGO
Cerro Cordo
June, 2022				August, 2017				August, 2012			Data from Rodríguez-Barreras et al., (2018)
Transect	# sea urchin	Density		Transect	# sea urchin	Density		Transect	# sea urchin	Density		Dead sea urchins (cm)
1	23	1.15		1	16	1.6		1	6	0.6		0
2	26	1.3		2	17	1.7		2	12	1.2
3	20	1		3	23	2.3		3	23	2.3
4	26	1.3		4	26	2.6		4	14	1.4
5	12	0.6		5	7	0.7		5	5	0.5
6	28	1.4		6	16	1.6		6	17	1.7
7	23	1.15		7	7	0.7		7	17	1.7
8	16	0.8		8	12	1.2		8	25	2.5
Size	Size	Size		Size	Size	Size		Size	Size	Size
5.6	5.6	7.7		7.2	7.3	7.5		5.88	5.22	4.79
7.2	8.3	6.5		6.4	6.5	6.8		7.55	4.01	6.22
4.8	7.9	5.6		6.5	7.4	7.7		2.37	5.08	6.03
7.7	7.6	7.6		6.8	7.2	5.1		5.96	7.95	7.01
6.1	8.1	4.8		6.5	7.1	6.9		7.04	7.07	7.12
6.8	6.3	5.9		6.4	5.6	4.6		7.18	7.36	5.94
7.2	5.5	5.8		6.8	6.5	6.6		7.27	7.85	7.17
6.7	6.6	5.7		7.05	6.7	6.2		5.28	6.27	7.3
7.6	5.5	5.4		5.8	7.9	5.7		6.13	6.21	7.11
6.8	7.1	6.5		7.1	7	7.4		5.27	5.39	6.68
7.5	6.4	5.9		7.4	8.7	7.2		6.8	6.57	7.25
5.9	6.2	6		6.7	6.6	5.3		4.97	5.78	7.13
6.6	5.9	6.7		5.9	8.1	6.8		6.51	6.97	6.65
3.7	7.5	6.5		8.1	7.9	6.8		4.98	1.78	5.04
6.6	6	6.4		6.8	7.2	8.2		8.23	5.24	6.75
7.1	6.5	6.4		8.3	2.2	7.2		8.25	7.72	6.72
6.4	6.4			7.2	6.6			7.26	7.26

## Sheet: PBA
Punta Bandera
2022-05-22				August, 2017				August, 2012			Data from Rodríguez-Barreras et al., (2018)
Transect	# sea urchin	Density		Transect	# sea urchin	Density		Transect	# sea urchin	Density		Dead sea urchins (cm)
1	17	0.85		1	14	1.4		1	6	0.6		0
2	14	0.7		2	28	2.8		2	9	0.9
3	16	0.8		3	17	1.7		3	10	1
4	28	1.4		4	15	1.5		4	13	1.3
5	23	1.15		5	6	0.6		5	8	0.8
6	29	1.45		6	12	1.2		6	8	0.8
7	26	1.3		7	2	0.2		7	6	0.6
8	15	0.75		8	7	0.7		8	19	1.9
Size	Size	Size		Size	Size	Size		Size	Size	Size
6.7	8	6.4		7.2	5.9	6.5		7.52	7.01	6.38
8.1	8.5	7.2		7	7	6.6		7.38	7.12	7.9
6.5	7.2	6.9		6.9	6.7	6.7		7.86	7.56	6.61
7.8	7.1	7.2		6.9	6.5	5.6		6.69	6.48	5.94
7.7	6.9	7.6		6.8	7.3	8.1		5.84	7.01	7.85
7.5	7.8	7.1		6.1	5.7	6.6		7.98	7.89	7.78
8.3	7.6	7.1		3.9	7.4	6.1		7.49	6.27	6.72
7.1	2.4	7.3		3.4	7.1	7.4		7.2	5.9	6.53
6.8	7.4	6.3		4.7	3.1	6.9		6.91	4.12	7.16
7.9	7.1	7.1		3.7	7.1	7.6		6.68	4.84	5.16
7	6.2	8		6.8	7.7	7.3		8.1	5.56	6.92
7.8	6.8	7.4		7.6	7.3	7.7		7.42	4.98	6.87
8.2	7.7	6.9		6.4	7.1	6.3		6.85	6.12	6.91
7.1	6.5	7.2		7.4	8.5	6.6		5.65	7.06	6.91
7.8	7.3	6.8		5.9	7.3	6.5		6.69	7.01	6.18
6.9	6.4	7.1		6.8	6.7	7.5		6.74	7.05	6.74
7.8	8.2			6.9	7.4			8.02	5.74

## Sheet: PTA
Punta Tamarindo
May, 2022				August, 2017				August, 2012			Data from Rodríguez-Barreras et al., (2018)
Transect	# sea urchin	Density		Transect	# sea urchin	Density		Transect	# sea urchin	Density		Dead measured sea urchins
1	0	0		1	7	0.7		1	6	0.6		All sea urchin dead but not counted or measured
2	0	0		2	12	1.2		2	12	1.2
3	0	0		3	21	2.1		3	23	2.3
4	0	0		4	19	1.9		4	14	1.4
5	0	0		5	13	1.3		5	5	0.5
6	0	0		6	20	2		6	17	1.7
7	0	0		7	15	1.5		7	17	1.7
8	0	0		8	20	2		8	25	2.5
Size	Size	Size		Size	Size	Size		Size	Size	Size
				7.1	6.6	5.5		7.58	6.29	6.6
				6.3	5.3	5		7.26	6.24	7.43
				5.9	5.8	4.6		6.25	7.87	6.94
				6.3	6.4	4.4		5.24	7.18	6.55
				5.6	4.8	5		6.27	6.47	7.56
				6.1	7	6.8		7.45	6.4	7.21
				6.2	4.7	5		7.84	7.86	7.62
				6.7	5.2	5.5		6.5	6.71	7.04
				5.4	6.6	5.4		6.51	7.68	7.4
				8	6	4		7.35	7.15	4.97
				7	7.5	6		7.26	4.78	5.75
				7.2	4.8	5		6.87	6.8	7.05
				7.6	5.6	6		6.2	6.84	6.64
				6.8	3.8	5.1		7.01	7.66	6.54
				6.5	5.9	6.5		7.1	7.7	7.08
				5.2	7.2	5.7		6.94	5.71	6.27
				7	6.5			5.71	7.7

## Sheet: PME
Punta Melones
May, 2022				August, 2017				August, 2012			Data from Rodríguez-Barreras et al., (2018)
Transect	# sea urchin	Density		Transect	# sea urchin	Density		Transect	# sea urchin	Density		Diseased measured sea urchins
1	0	0		1	6	0.6		1	5	0.5		4.3
2	0	0		2	9	0.9		2	8	0.8		6.32
3	0	0		3	30	3		3	29	2.9
4	1	0.05		4	11	1.1		4	5	0.5
5	0	0		5	15	1.5		5	25	2.5
6	0	0		6	0	0		6	6	0.6
7	0	0		7	0	0		7	13	1.3
8	0	0		8	12	1.2		8	16	1.6
Size	Size	Size		Size	Size	Size		Size	Size	Size
5.91				5.2	8	6		6.4	7.83	5.58
				6	7	8		6.15	7.49	6.95
				5.9	6.3	4.3		5.91	7.01	6.72
				6	7.6	4.4		7.26	6.22	7.87
				3.7	6.8	7		7.91	7.43	6.64
				4.5	6.8	5.8		6.74	7.16	6.38
				6.4	7.8	7.2		6.29	6.52	6.56
				4.3	8	7		6.72	7.12	6.94
				6.4	7.6	7.1		6.31	6.62	5.08
				8	8.4	5.4		8.61	7.09	8.12
				7.8	6.2	8.1		6.87	7.7	8.19
				6.4	6.2	6.5		6.95	6.69	7.96
				7	7.6	5.4		6.52	6.36	5.89
				6.4	6.5	7.5		6.74	6.04	5.98
				6.4	6.6	7		6.58	6.3	7.66
				5.8	7.5	6.4		5.94	7.11	6.54
				7.3	6.8			6.54	4.97

## Sheet: PSA
Punta Sardinera
2022-06-12
Transect	sea urchin #	Density	Diseased		Dead measured sea urchins
1	15	0.75	0		7
2	31	1.55	3		8.3
3	22	1.1	2		7.9
4	17	0.85	2		8.2
5	6	0.3	1		6.7
6	22	1.1	1		7.5
7	4	0.2	0		7.1
8	10	0.5	5		6.9
					7.4
Size	Size	Size			8.4
7.5	7.8	5.1			8.3
5.1	7.4	6.5			8.3
5.6	7.2	6.1			6.9
4.8	8	6			7.5
5.7	7.9	7.4			7.3
6.3	7	7.9			6.9
6	6.1	7.4			8
7.2	7.4	6.7			7.6
8.4	7.2	3.7			7.4
8.6	6.7	7.6			7.6
7.7	6.8	6.8			6.6
5.4	5.7	6.5			6.3
8.1	5.9	5.6			7
7.6	8.1	7
8.1	5.2	7.5
7.4	8	7.7
5.7	7.5

## Sheet: PBL
Playa Peña Blanca
June, 2022
Transect	# sea urchin	Density		Dead sea urchins (cm)
1	32	1.6		0
2	11	0.55
3	8	0.4
4	8	0.4
5	10	0.5
6	24	1.2
7	21	1.05
8	11	0.55
Size	Size	Size
4.9	6.9	5.3
5.2	4.2	5.4
6.4	5.7	7.7
5.3	5.6	4.1
7.6	5.5	4.2
5.7	5.2	7.7
6.6	4.5	5.8
5.1	6.9	5
5.7	7.1	5.5
5.8	5.1	7.6
7.1	7.5	5
5.4	7.7	4
6.2	4.4	6.7
6.3	6.8	7.1
5.9	4	6.9
4	5.1	6.8
6.5	5.4

## Sheet: SBE
Shacks Beach
June, 2022
Transect	# sea urchin	Density		Dead sea urchins (cm)
1	11	0.55		0
2	12	0.6
3	12	0.6
4	14	0.7
5	0	0
6	0	0
7	3	0.15
8	6	0.3
		0.3625
Size	Size	Size
7.8	8	8.2
8.2	7.1	8.4
7.8	7.8	7.9
7.9	7.3	7.9
8.4	5.2	7.4
8.5	7.1	7.2
8.6	8.6	7.8
6.6	7.4	8.4
8.3	7.9	7.6
6.3	5.9	7
5.6	7.8	8
7.3	7	4.3
6.5	7	6.3
6.4	4.7	6.8
7.9	4.4	7.1
3.1	4.7	8.1
5.5	4.4

## Sheet: ESC
El Escambrón
July, 2022
Transect	# sea urchin	Density		Dead sea urchins
1	7	0.35		7
2	9	0.45
3	0	0
4	1	0.05
5	0	0
6	0	0
7	0	0
8	0	0
Size	Size	Size
6.3	8.1	5.4
6.6	5.7	7
4.6	7.4	5.7
7.8	7.5	4.9
7.1	8.1	6.6
5.6	8.4	8.7
7.3	8.4
